# Supplementary material for: Variability and uncertainty in forest biomass estimates from the tree to landscape scale: the role of allometric equations
Source: Carbon Balance Manag. 2020 May 14;15:8. doi: 10.1186/s13021-020-00143-6 (PMC7227279; doi:10.1186/s13021-020-00143-6)
Supplement: Supplementary file 4 — Additional file 4. Destructive sampling data; Data from each tree destructively sampled for this study showing component biomass (kg), diameter at breast height (cm), and height (m) as well as basal area (m2 ha−1) and tree density (number of trees ha−1) of 7.32 m radius plots measured around each tree. [file 13021_2020_143_MOESM4_ESM.csv]

Species	DBH_cm	Height_m	Bole_kg	Bark_kg	Foliage_kg	Branch_kg	Aboveground_Total_kg	Trees_per_ha	Basal_Area_m2_per_ha
PICO	2.5	3.2	0	0	0.8	0.9	1.7	2139	9
PICO	4.3	4	0	0	1	2.1	3.1	1604	8.2
PICO	6.5	5.2	0	0	2.2	6	8.2	1307	3.7
PICO	8.5	6.4	1	0.1	3.7	10.7	15.6	1010	4.6
PICO	10.2	5.9	4.1	0.5	3.4	11	19	594	13.2
PICO	11	5.9	4.9	0.8	7.5	18.6	31.8	1010	6.2
PICO	12	10	12.1	1	8.1	22.3	43.5	951	7.3
PICO	12.8	7.5	14.3	2.2	8	20.8	45.3	416	2.5
PICO	13.5	8.1	16.7	2.1	10.2	21.7	50.7	1248	5.8
PICO	14.8	14.5	44.2	3.8	6.7	18.4	73.1	1010	31.2
PICO	15	14.6	43.3	3	5.1	17.2	68.6	891	32.5
PICO	17.8	6.9	20	2.7	12.4	35.3	70.4	238	0.5
PICO	19	19.5	105.6	7	5.6	26.1	144.3	1129	39.7
PICO	21.9	13.9	64.2	4.3	15.5	82	166	772	31.5
PICO	22.5	16.2	116.1	11.4	11.2	27.7	166.4	356	17.3
PICO	23.5	19.4	158.8	13.4	16.5	46.1	234.7	772	36.2
PICO	25.8	21.1	174.2	10.3	21.1	46	251.6	951	44.9
PICO	25.9	20.5	206.6	13.3	24.1	72.9	316.9	535	30.7
PICO	27.8	20.5	208.3	14.4	17.1	43.6	283.5	772	14.4
PICO	29.9	21	247.2	15.8	23.3	72.1	358.4	713	31.7
PIPO	4.9	3	0	0	1.5	4.2	5.7	238	23.4
PIPO	12.7	6.3	7.7	3	4.6	17.3	32.6	416	29.7
PIPO	19	9.4	35.3	8.3	6.3	46.5	96.4	416	17.3
PIPO	24	10.3	84.1	16.8	17.9	48.1	166.9	178	13
PIPO	32.5	10.6	126.6	18.4	31.7	135.6	312.3	59	5.5
PIPO	39.3	13.1	286.1	38.2	50.2	377.9	752.4	59	4.7
PIPO	44.9	13.9	308	39.3	41.6	254.9	643.9	59	19.7
PIPO	49	14.5	499.1	60.2	104.3	846.7	1510.2	0	0
PIPO	51.6	16.8	618.5	81.5	79.5	615.9	1395.4	297	20.5
PIPO	61.8	15.4	738.5	89.7	153.9	1206	2188.1	0	0
PSME	2.4	3.2	0	0	1.2	2	3.2	416	14.7
PSME	7.8	6.7	1.9	0.5	4.2	13.7	20.3	535	30.3
PSME	10	8.4	5.3	1.2	5.9	16.8	29.3	535	14.5
PSME	17.8	11.7	30.1	7.3	17.7	35.2	90.4	535	18.8
PSME	24.3	13.5	82	22.7	23.8	51.9	180.3	535	15.5
PSME	27	13.5	100.3	38.7	24.6	50.6	214.2	535	7.9
PSME	30.4	14.8	171.4	44.5	18	58.2	292.2	297	19
PSME	38.2	19.7	355.1	67.6	49.3	126.6	598.5	119	12.4
PSME	44.1	17.5	345.4	66.9	65.1	148	625.4	178	7.2
PSME	46.6	18.4	434.2	81.8	72.1	220.9	809.1	178	15.9
